# Supplementary material
Source: MDPI journal article supplement (https://www.mdpi.com/2039-4365/12/4/19)
Supplement: s1 [file s1 › thalassrep-1964506-supplementary.pdf]

## Supplementary material

**Supplementary Table S1.** Comparison of complication prevalence between two  $\beta$ -thalassaemia cohorts from Cyprus and Greece.

| Complication    | Cyprus | Greece |
|-----------------|--------|--------|
| N               | 647    | 433    |
| Mean age, years | 43     | 33.3   |
| Bone disease    | 33.7%  | 6.4% * |
| Hypogonadism    | 28.4%  | 21.6%  |
| Diabetes        | 14.7%  | 7.3%   |
| Hypothyroidism  | 13%    | 20.7%  |
| Heart disease   | 8.8%   | 8.6%   |

\* only clinically significant osteoporosis

**Supplementary Table S2.** Comparison of serum ferritin concentration distribution in transfusion-dependent  $\beta$ -thalassaemia (TDT) patients between Cyprus and Egypt

| Serum Ferritin<br>ng/dl | Cyprus TDT | Egypt [17]<br>[aged 6-20 years<br>(mean, 13.0)] |
|-------------------------|------------|-------------------------------------------------|
| <1000                   | 48.9%      | 0                                               |
| 1-2500                  | 25.9%      | 47.5%                                           |
| >2500                   | 25.2%      | 52.5%                                           |

**Supplementary Table S3.** Comparison of cardiac T2\* value and estimated liver iron concentration (LIC) in transfusion-dependent  $\beta$ -thalassaemia (TDT) population in different countries (NR, not reported)

| Cardiac T2* (ms)      | Cyprus TDT | Greece TDT [18] | Australia TDT [19] | Indonesia TDT [20] |
|-----------------------|------------|-----------------|--------------------|--------------------|
| N                     | 267        | 1078            | 81                 | 238                |
| Median age, years     | 44         | 41              | >18                | NR                 |
| >20ms                 | 85.4%      | 86.5%           | 77.7%              | 82.7%              |
| 10-19ms               | 10.1%      | 7.4%            | 11.8%              | 11.4%              |
| <9ms                  | 4.5%       | 6.1%            | 10.5%              | 5.9%               |
| LIC (mg/g dry weight) |            |                 |                    |                    |
| <3                    | 51%        | 52.1%           |                    | 13.4%              |
| 3-7                   | 22.5%      | 18.5%           |                    | 20.6%              |
| 7-15                  | 13%        | 14.6%           |                    | 29%                |
| >15                   | 13.5%      | 14.8%           |                    | 37%                |

**Supplementary Table S4.** Comparison of education level in  $\beta$ -thalassaemia patients in different countries

| Level of education | Cyprus      | Greece [23]    | Iran [24]       |
|--------------------|-------------|----------------|-----------------|
| N                  | 251         | 119            | 3601            |
| Age, years         | 44 (median) | 39.7 $\pm$ 8.5 | 21.6 $\pm$ 10.3 |
| None               | 1.2%        |                | 27%             |
| Primary            | 6%          | 8.4%           | 39.7%           |
| Secondary          | 63.7%       | 41.2%          | 18.1%           |
| Tertiary           | 29.1%       | 50.4%          | 15.2%           |
| Totals             | 100%        | 100%           | 100%            |
